# Supplementary material for: Micropillar enhanced FRET-CRISPR biosensor for nucleic acid detection
Source: Royal Society of Chemistry journal article supplement (doi:10.1039/d3lc00780d), 2023-11-20
Supplement: d3lc00780d1.pdf [file d3lc00780d1.pdf]

ARTICLE

## Micropillar enhanced FRET-CRISPR biosensor for nucleic acid detection

Mengdi Bao,<sup>a</sup> Stephen J. Dollery,<sup>b</sup> FNU Yuqing,<sup>a</sup> Gregory J. Tobin,<sup>b</sup> and Ke Du

The generation of air bubbles occurs as liquid is pushed into the channel, leading to uneven flow, as depicted in Fig. S1(a). To address this issue, the channel was initially placed in a desiccator for 15 min, followed by immersion in nuclease-free water. The trapped air was subsequently removed, allowing the channel to be completely filled with water. As a result, the previously observed uneven flow situation could be avoided when the channel was further injected with liquid, as demonstrated in Fig. S1(b).

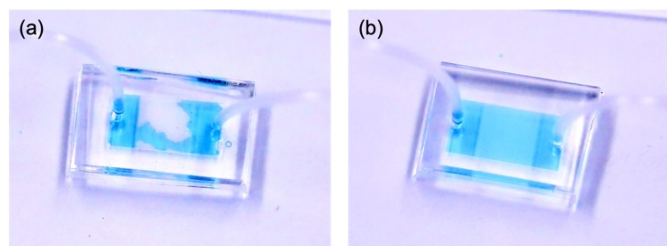

**Figure S1.** Photograph of channel filled with food dye, (a) without and (b) with bubble-avoidance approach.

<sup>a</sup> Department of Mechanical Engineering, Kate Gleason College of Engineering, Rochester Institute of Technology, Rochester, NY 14623, United States

<sup>b</sup> Biological Mimetics, Inc. 124 Byte Drive, Frederick, MD 21702, United States

<sup>c</sup> Department of Electrical and Computer Engineering, University of Georgia, Athens, GA 30602, United States
